# Supplementary material for: Serum Proteomic Analysis Reveals Vitamin D-Binding Protein (VDBP) as a Potential Biomarker for Low Bone Mineral Density in Mexican Postmenopausal Women
Source: MDPI journal article supplement (doi:10.3390/nu11122853), 2019-11-21
Supplement: s1 [file s1]

**a)**

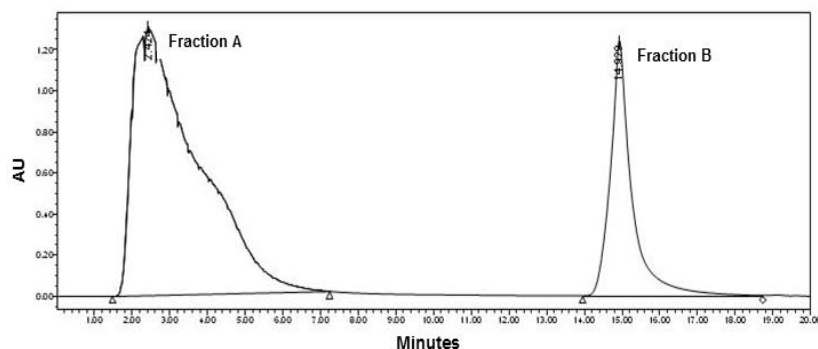

| Fraction              | Retention time | Area     | Area % |
|-----------------------|----------------|----------|--------|
| A ( sample depleted ) | 2.424          | 15825585 | 76.03  |
| B (albumin and IgG's) | 14.929         | 49269392 | 23.97  |

**b)**

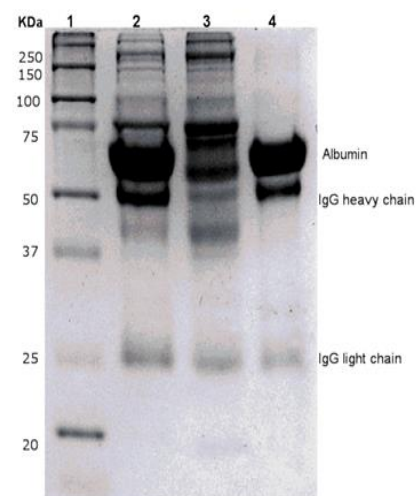

**Figure S1:** Depletion of albumin and IgG's in serum samples. **(a)** Representative chromatogram obtained after depletion. Fraction A: Depleted proteins and Fraction B: Immunoglobulin G and albumin. **(b)** SDS-PAGE of serum proteins before and after depletion. Line 1: Weight marker, lane 2: serum before depletion, lane 3: depleted proteins (fraction A), Lane 4: albumin and IgG's (fraction B). Twenty micrograms of proteins were loaded per lane and separated in 10% polyacrylamide gel and visualized by Coomassie blue staining.

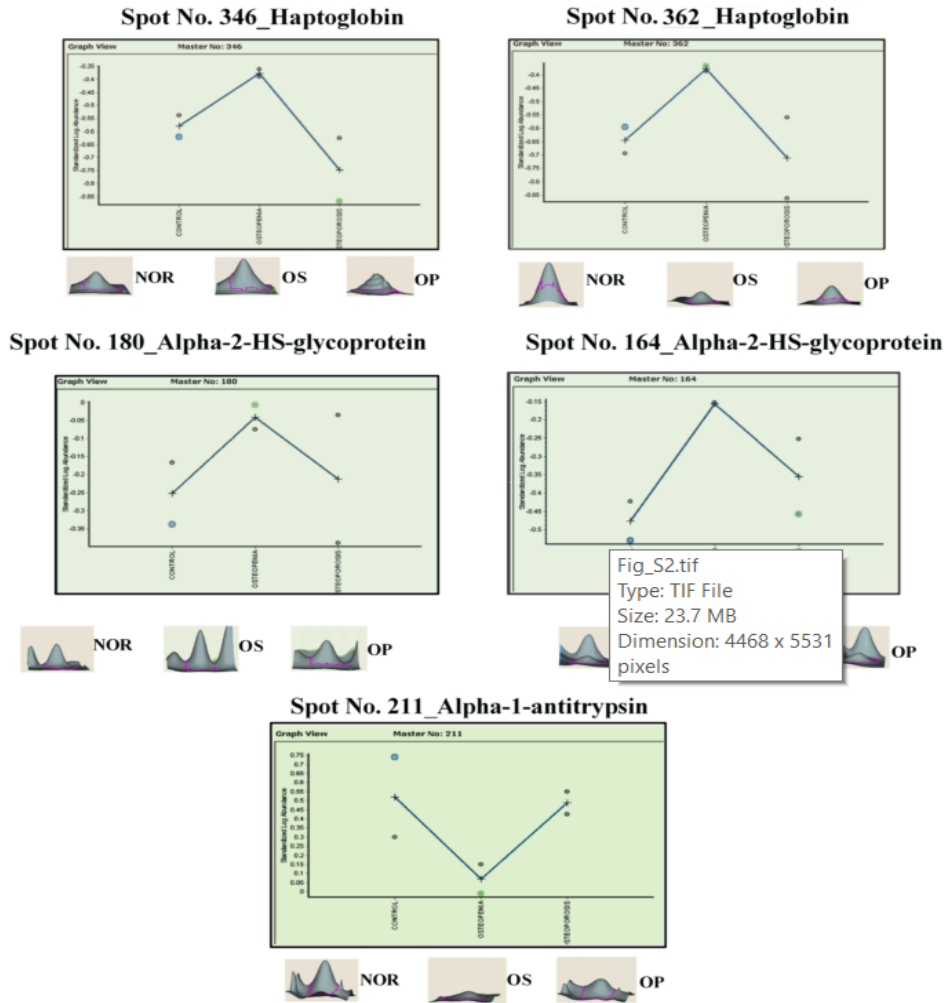

**Figure S2:** Additional differentially expressed proteins in postmenopausal women implicated in bone metabolism. The 3D images show the intensity representation of those proteins selected for their association to BMD and with a role in bone remodeling. Proteins identified in the biological variation analysis (BVA), with  $p$ -value  $> 0.05$  between the group of women with OS and OP.
